# Supplementary material
Source: Springer Nature journal article supplement (https://www.springermedizin.de/resource/supplementary/13075_2011_3138_MOESM2_ESM.pdf/9693876)

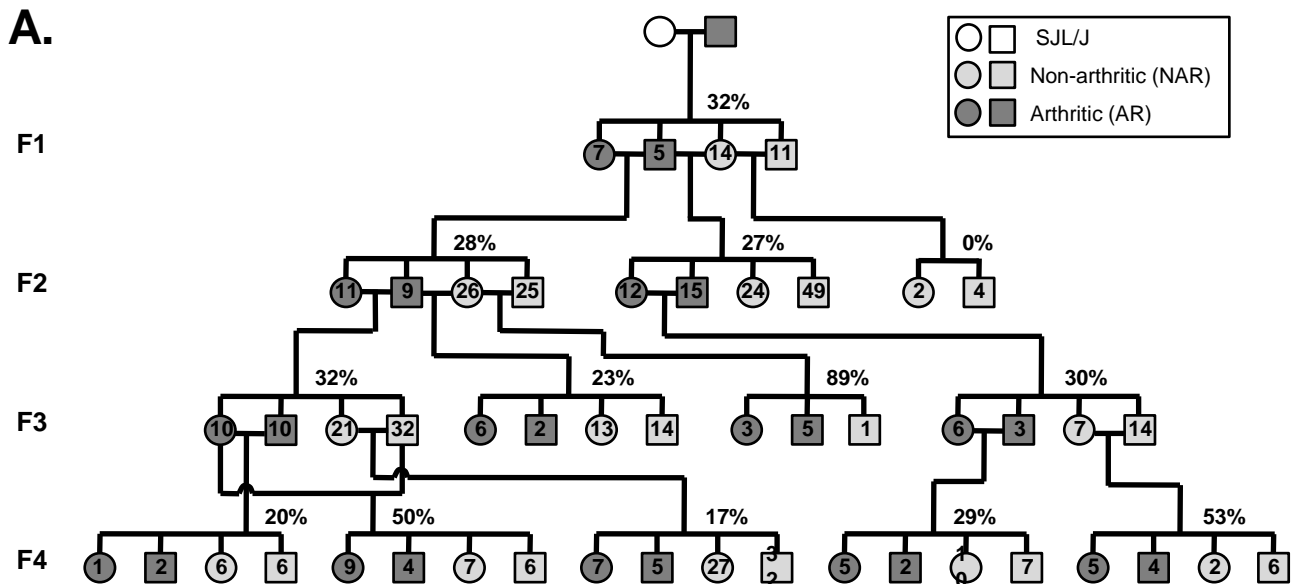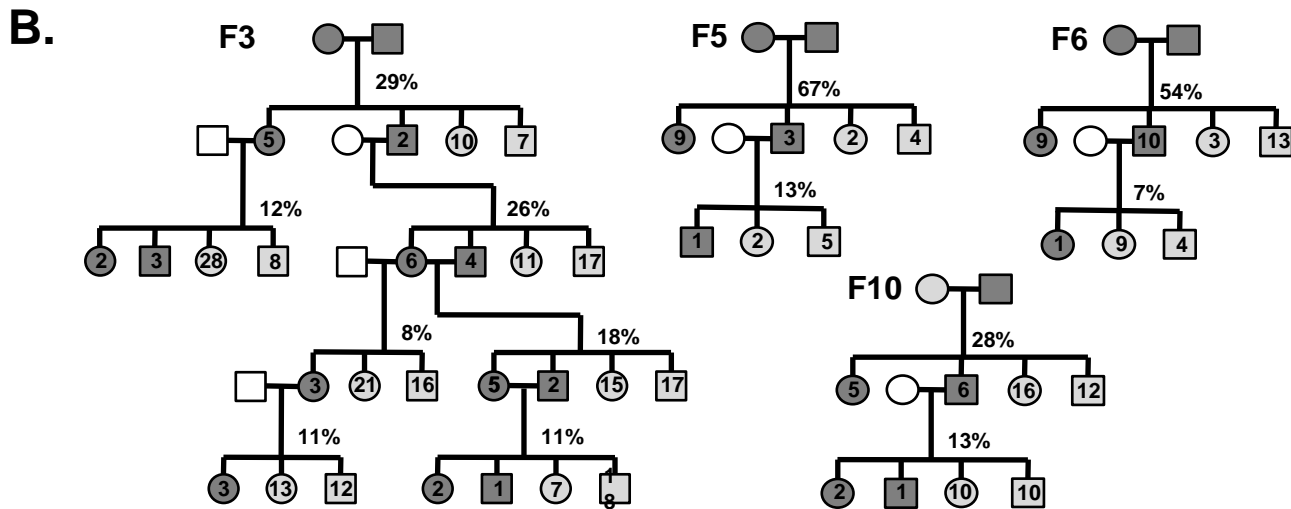

Supplement: MOESM2 [file 9693876]
